**Table S1.** Accession numbers of sequences used in the study

| Accession #         | Ortholog | Animal                   | Species                          | Class/Rank          | Order             | Family           |
|---------------------|----------|--------------------------|----------------------------------|---------------------|-------------------|------------------|
| <b>Aqp8aa</b>       |          |                          |                                  |                     |                   |                  |
| ENSONIP00000024898  | Aqp8aa   | Nile tilapia             | <i>Oreochromis niloticus</i>     | Acanthomorpha       | Perciformes       | Cichlidae        |
| ENSGACP00000012041  | Aqp8aa   | Three-spined stickleback | <i>Gasterosteus aculeatus</i>    | Acanthomorpha       | Gasterosteiformes | Gasterosteidae   |
| ENSGMOP00000001261  | Aqp8aa   | Atlantic cod             | <i>Gadus morhua</i>              | Acanthomorpha       | Gadiformes        | Gadidae          |
| CU071487            | Aqp8aa   | Rainbow trout            | <i>Oncorhynchus mykiss</i>       | Protacanthopterygii | Salmoniformes     | Salmonidae       |
| SsAqp8aa1           | Aqp8aa1  | Atlantic salmon          | <i>Salmo salar</i>               | Protacanthopterygii | Salmoniformes     | Salmonidae       |
| DW573347            | Aqp8aa2  | Atlantic salmon          | <i>Salmo salar</i>               | Protacanthopterygii | Salmoniformes     | Salmonidae       |
| EV367413            | Aqp8aa   | Lake whitefish           | <i>Coregonus clupeaformis</i>    | Protacanthopterygii | Salmoniformes     | Salmonidae       |
| ENSDARP00000066381  | Aqp8aa   | Zebrafish                | <i>Danio rerio</i>               | Ostariophysi        | Cypriniformes     | Cyprinidae       |
| FJ655386            | Aqp8aa   | Zebrafish                | <i>Danio rerio</i>               | Ostariophysi        | Cypriniformes     | Cyprinidae       |
| CK402738            | Aqp8aa   | Blue catfish             | <i>Ictalurus furcatus</i>        | Ostariophysi        | Siluriformes      | Ictaluridae      |
| BAH89254            | Aqp8aa   | Japanese eel             | <i>Anguilla japonica</i>         | Elopomorpha         | Anguilliformes    | Anguillidae      |
| <b>Aqp8ab</b>       |          |                          |                                  |                     |                   |                  |
| ENSONIP00000024897  | Aqp8ab   | Nile tilapia             | <i>Oreochromis niloticus</i>     | Acanthomorpha       | Perciformes       | Cichlidae        |
| EB039337            | Aqp8ab   | Atlantic halibut         | <i>Hippoglossus hippoglossus</i> | Acanthomorpha       | Pleuronectiformes | Pleuronectidae   |
| ACQ57933            | Aqp8ab   | Sablefish                | <i>Anoplopoma fimbria</i>        | Acanthomorpha       | Scorpaeniformes   | Anoplopomatidae  |
| ENSGACP00000019141  | Aqp8ab   | Three-spined stickleback | <i>Gasterosteus aculeatus</i>    | Acanthomorpha       | Gasterosteiformes | Gasterosteidae   |
| ENSORLP00000003812  | Aqp8ab   | Medaka                   | <i>Oryzias latipes</i>           | Acanthomorpha       | Beloniformes      | Adrianichthyidae |
| ENSGMOP00000016961  | Aqp8ab   | Atlantic cod             | <i>Gadus morhua</i>              | Acanthomorpha       | Gadiformes        | Gadidae          |
| CU071568            | Aqp8ab   | Rainbow trout            | <i>Oncorhynchus mykiss</i>       | Protacanthopterygii | Salmoniformes     | Salmonidae       |
| SsAqp8ab1           | Aqp8ab   | Atlantic salmon          | <i>Salmo salar</i>               | Protacanthopterygii | Salmoniformes     | Salmonidae       |
| ENSDARP00000096730  | Aqp8ab   | Zebrafish                | <i>Danio rerio</i>               | Ostariophysi        | Cypriniformes     | Cyprinidae       |
| EU341834            | Aqp8ab   | Zebrafish                | <i>Danio rerio</i>               | Ostariophysi        | Cypriniformes     | Cyprinidae       |
| DT136626            | Aqp8ab   | Fathead minnow           | <i>Pimephales promelas</i>       | Ostariophysi        | Cypriniformes     | Cyprinidae       |
| DT342244            | Aqp8ab   | Fathead minnow           | <i>Pimephales promelas</i>       | Ostariophysi        | Cypriniformes     | Cyprinidae       |
| ADO28238            | Aqp8ab   | Blue catfish             | <i>Ictalurus furcatus</i>        | Ostariophysi        | Siluriformes      | Ictaluridae      |
| <b>Aqp8b</b>        |          |                          |                                  |                     |                   |                  |
| ENSTRUP00000007329  | Aqp8b    | Torafugu                 | <i>Takifugu rubripes</i>         | Acanthomorpha       | Tetraodontiformes | Tetraodontidae   |
| BAL44700            | Aqp8b    | Mefugu                   | <i>Takifugu obscurus</i>         | Acanthomorpha       | Tetraodontiformes | Tetraodontidae   |
| ENSTNIP000000021161 | Aqp8b    | Green-spotted pufferfish | <i>Tetraodon nigroviridis</i>    | Acanthomorpha       | Tetraodontiformes | Tetraodontidae   |
| DQ889225            | Aqp8b    | Gilthead seabream        | <i>Sparus aurata</i>             | Acanthomorpha       | Perciformes       | Sparidae         |
| GO620173            | Aqp8b    | Sablefish                | <i>Anoplopoma fimbria</i>        | Acanthomorpha       | Scorpaeniformes   | Anoplopomatidae  |
| ENSGACP00000015550  | Aqp8b    | Three-spined stickleback | <i>Gasterosteus aculeatus</i>    | Acanthomorpha       | Gasterosteiformes | Gasterosteidae   |
| GE808463            | Aqp8b    | Copper rockfish          | <i>Sebastes caurinus</i>         | Acanthomorpha       | Scorpaeniformes   | Sebastidae       |
| EB038315            | Aqp8b    | Atlantic halibut         | <i>Hippoglossus hippoglossus</i> | Acanthomorpha       | Pleuronectiformes | Pleuronectidae   |
| DV567193            | Aqp8b    | European flounder        | <i>Platichthys flesus</i>        | Acanthomorpha       | Pleuronectiformes | Pleuronectidae   |
| FE950965            | Aqp8b    | Turbot                   | <i>Scophthalmus maximus</i>      | Acanthomorpha       | Pleuronectiformes | Scophthalmidae   |
| AFQ36924            | Aqp8b    | Sockeye salmon           | <i>Oncorhynchus nerka</i>        | Protacanthopterygii | Salmoniformes     | Salmonidae       |
| AFQ36926            | Aqp8b    | Chum salmon              | <i>Oncorhynchus keta</i>         | Protacanthopterygii | Salmoniformes     | Salmonidae       |
| SsAqp8b             | Aqp8b    | Atlantic salmon          | <i>Salmo salar</i>               | Protacanthopterygii | Salmoniformes     | Salmonidae       |
| ENSDARP00000005510  | Aqp8b    | Zebrafish                | <i>Danio rerio</i>               | Ostariophysi        | Cypriniformes     | Cyprinidae       |
| FJ695516            | Aqp8b    | Zebrafish                | <i>Danio rerio</i>               | Ostariophysi        | Cypriniformes     | Cyprinidae       |
